# Supplementary material for: Large magnetic anisotropy of a decorated spin-chain system K2Co3(MoO4)3(OH)2
Source: Royal Society of Chemistry journal article supplement (doi:10.1039/d4dt00203b), 2024-01-01

## Supporting Information

### Large Magnetic Anisotropy of a Decorated Spin-Chain System $\text{K}_2\text{Co}_3(\text{MoO}_4)_3(\text{OH})_2$

Bhakti Patel,<sup>a</sup> Feng Ye,<sup>b</sup> W. L. N. C. Liyanage,<sup>c</sup> Carolyn Buchanan,<sup>c</sup> Dusting A. Gilbert,<sup>c,d</sup> Joseph W. Kolis,<sup>a</sup> Liurukara D Sanjeewa<sup>e,f\*</sup>

<sup>a</sup>*Department of Chemistry and Center for Optical Materials Science and Engineering Technologies (COMSET), Clemson University, Clemson, SC 29634-0973, USA*

<sup>b</sup>*Neutron Scattering Division, Oak Ridge National Laboratory, Oak Ridge, TN 37831, USA*

<sup>c</sup>*Department of Physics and Astronomy, University of Tennessee, Knoxville, Tennessee 37996, USA*

<sup>d</sup>*Materials Science and Engineering, University of Tennessee, Knoxville, Tennessee 37996, USA*

<sup>e</sup>*University of Missouri Research Reactor (MURR), University of Missouri, Columbia, MO 65211, USA*

<sup>f</sup>*Department of Chemistry, University of Missouri, Columbia, MO 65211, USA*

*\*Corresponding Author*

**Table SI1.** X-ray single crystal refinement parameters of  $\text{K}_2\text{Co}_3(\text{MoO}_4)_3(\text{OH})_2$ .

**Figure SI1:** Magnetic susceptibilities,  $\chi = M/H$ , of  $\text{K}_2\text{Co}_3(\text{MoO}_4)_3(\text{OH})_2$  as a function of temperature under an applied field of 500 Oe along the *a*-axis.

**Figure SI2:** Magnetic susceptibilities,  $\chi = M/H$ , of  $\text{K}_2\text{Co}_3(\text{MoO}_4)_3(\text{OH})_2$  as a function of temperature under an applied field of 500 Oe along the *c*-axis.

**Table SII.** X-ray single crystal refinement parameters of  $K_2Co_3(MoO_4)_3(OH)_2$ . The data were refined in the orthorhombic crystal system space group  $Pnma$  (No. 62) and the unit cell parameters are  $a = 17.9394(4) \text{ \AA}$ ,  $b = 6.0836(2) \text{ \AA}$ ,  $c = 12.3969(4) \text{ \AA}$ ,  $V = 1352.95 \text{ \AA}^3$  and  $Z = 4$ .

| Atom  | $x$        | $y$        | $z$         | $U_{eq}$  | Wyckoff |
|-------|------------|------------|-------------|-----------|---------|
| K(1)  | 0.36091(6) | 0.25000    | -0.03775(4) | 0.0224(4) | 4c      |
| K(2)  | 0.25395(7) | 0.25000    | 0.66356(5)  | 0.0342(5) | 4c      |
| Co(1) | 0.40172(1) | 0.25000    | 0.25767(6)  | 0.0104(1) | 4c      |
| Co(2) | 0.55509(5) | 0.50205(4) | 0.31399(6)  | 0.0157(4) | 8d      |
| Mo(1) | 0.44026(5) | 0.75000    | 0.11421(4)  | 0.0116(5) | 4c      |
| Mo(2) | 0.60608(4) | 0.25000    | 0.56580(5)  | 0.0128(1) | 4c      |
| Mo(3) | 0.20163(6) | 0.25000    | 0.32692(1)  | 0.0102(5) | 4c      |
| O(1)  | 0.51170(3) | 0.25000    | 0.23014(2)  | 0.0112(5) | 4c      |
| O(2)  | 0.58890(3) | 0.75000    | 0.40268(3)  | 0.0255(6) | 4c      |
| O(3)  | 0.52041(6) | 0.75000    | 0.20028(5)  | 0.0137(5) | 4c      |
| O(4)  | 0.38722(5) | 0.51118(3) | 0.14285(3)  | 0.0167(5) | 8d      |
| O(5)  | 0.15512(5) | 0.01456(2) | 0.27677(3)  | 0.0142(3) | 8d      |
| O(6)  | 0.56721(4) | 0.00932(3) | 0.62578(2)  | 0.0160(3) | 8d      |
| O(7)  | 0.47202(4) | 0.75000    | -0.01787(1) | 0.0222(3) | 4c      |
| O(8)  | 0.58443(6) | 0.25000    | 0.42432(4)  | 0.0162(3) | 4c      |
| O(9)  | 0.29397(4) | 0.25000    | 0.28221(4)  | 0.0145(1) | 4c      |
| O(10) | 0.70082(5) | 0.25000    | 0.58552(5)  | 0.0145(2) | 4c      |
| O(11) | 0.19817(3) | 0.25000    | 0.46601(3)  | 0.0346(1) | 4c      |

**Figure S11:** Magnetic susceptibilities,  $\chi = M/H$ , of  $\text{K}_2\text{Co}_3(\text{MoO}_4)_3(\text{OH})_2$  as a function of temperature under an applied field of 500 Oe along the  $a$ -axis.

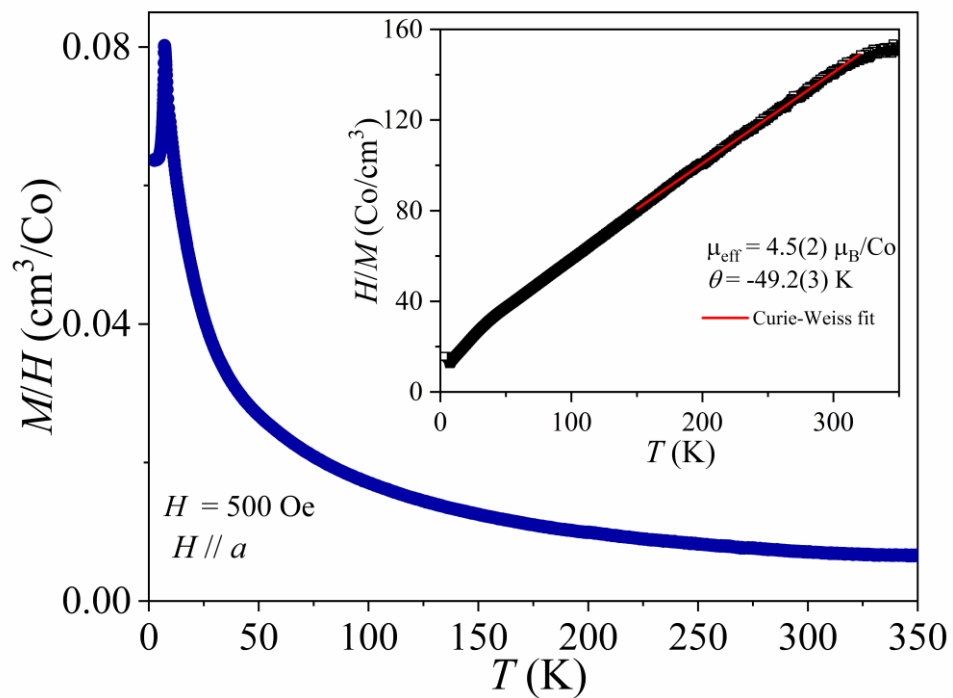

**Figure SI2:** Magnetic susceptibilities,  $\chi = M/H$ , of  $\text{K}_2\text{Co}_3(\text{MoO}_4)_3(\text{OH})_2$  as a function of temperature under an applied field of 500 Oe along the  $c$ -axis.

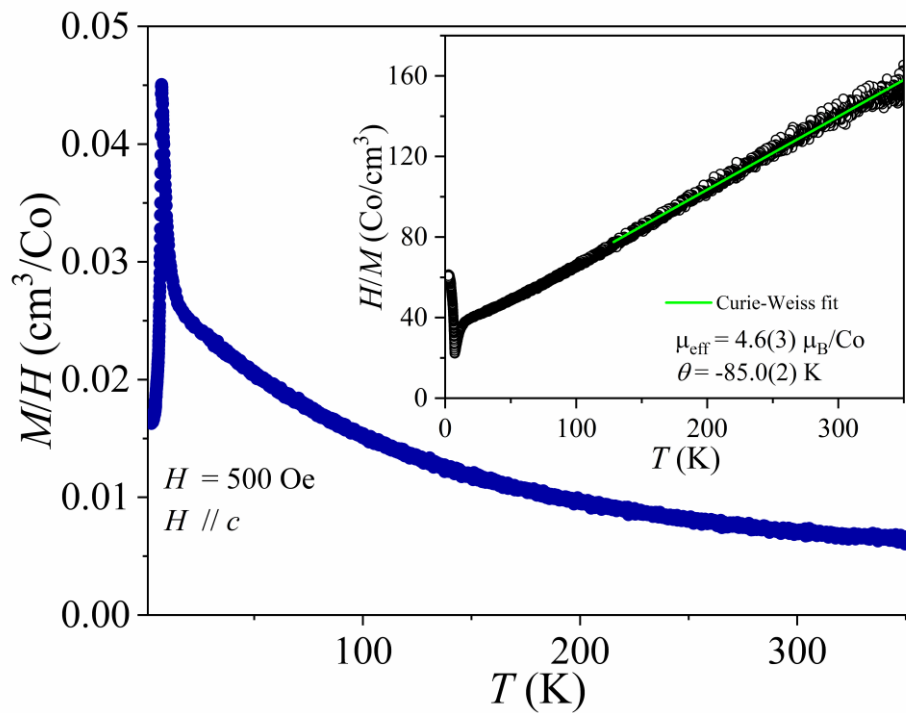

Supplement: d4dt00203b1.pdf [file d4dt00203b1.pdf]
